# Supplementary material
Source: PubMed Central journal article supplement (PMC3138065)
Supplement: NIHMS303350-supplement-Suppl_.pdf [file NIHMS303350-supplement-Suppl_.pdf]

# **Species Specificity of the Complement Inhibitor Compstatin by All-atom Molecular Dynamics Simulations**

Phanourios Tamamis<sup>1</sup>, Dimitrios Morikis<sup>2\*</sup>, Christodoulos A. Floudas<sup>3\*</sup>, Georgios Archontis<sup>1\*</sup>

<sup>1</sup>*Department of Physics, University of Cyprus, PO20537, CY1678, Nicosia, Cyprus.*

<sup>2</sup>*Department of Bioengineering, University of California, Riverside, California 92521, USA.*

<sup>3</sup>*Department of Chemical Engineering, Princeton University, Princeton, New Jersey 08544, USA.*

**Supplementary Material**

**Supplementary Figure SF1.** Probability density maps (%) of side-chain contacts for selected protein-ligand side-chain pairs. Two side-chains were considered in contact if the distance between their geometric centers was less than 6 Å. The plots from **top** to **bottom** display the human, rat and difference (human-rat) maps. The human and rat maps are averaged, respectively, over the human (H1-H2) and rat (R1-R3) complex simulations. The difference map shows that most protein-ligand side-chain contacts are less frequent in the rat complex.

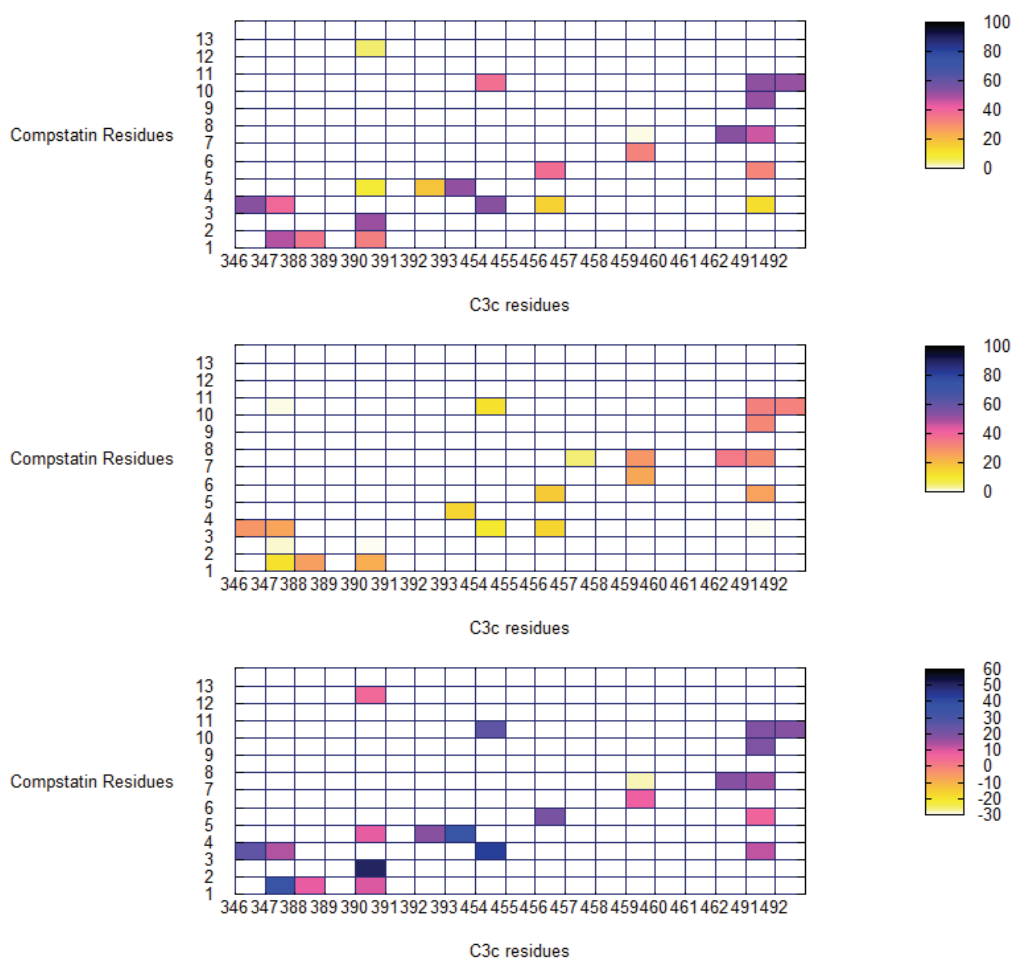

**Supplementary Figure SF2.** Dial plots of the time evolution of selected compstatin and C3c side-chain torsional angles, during the human and rat C3c:compstatin simulations.

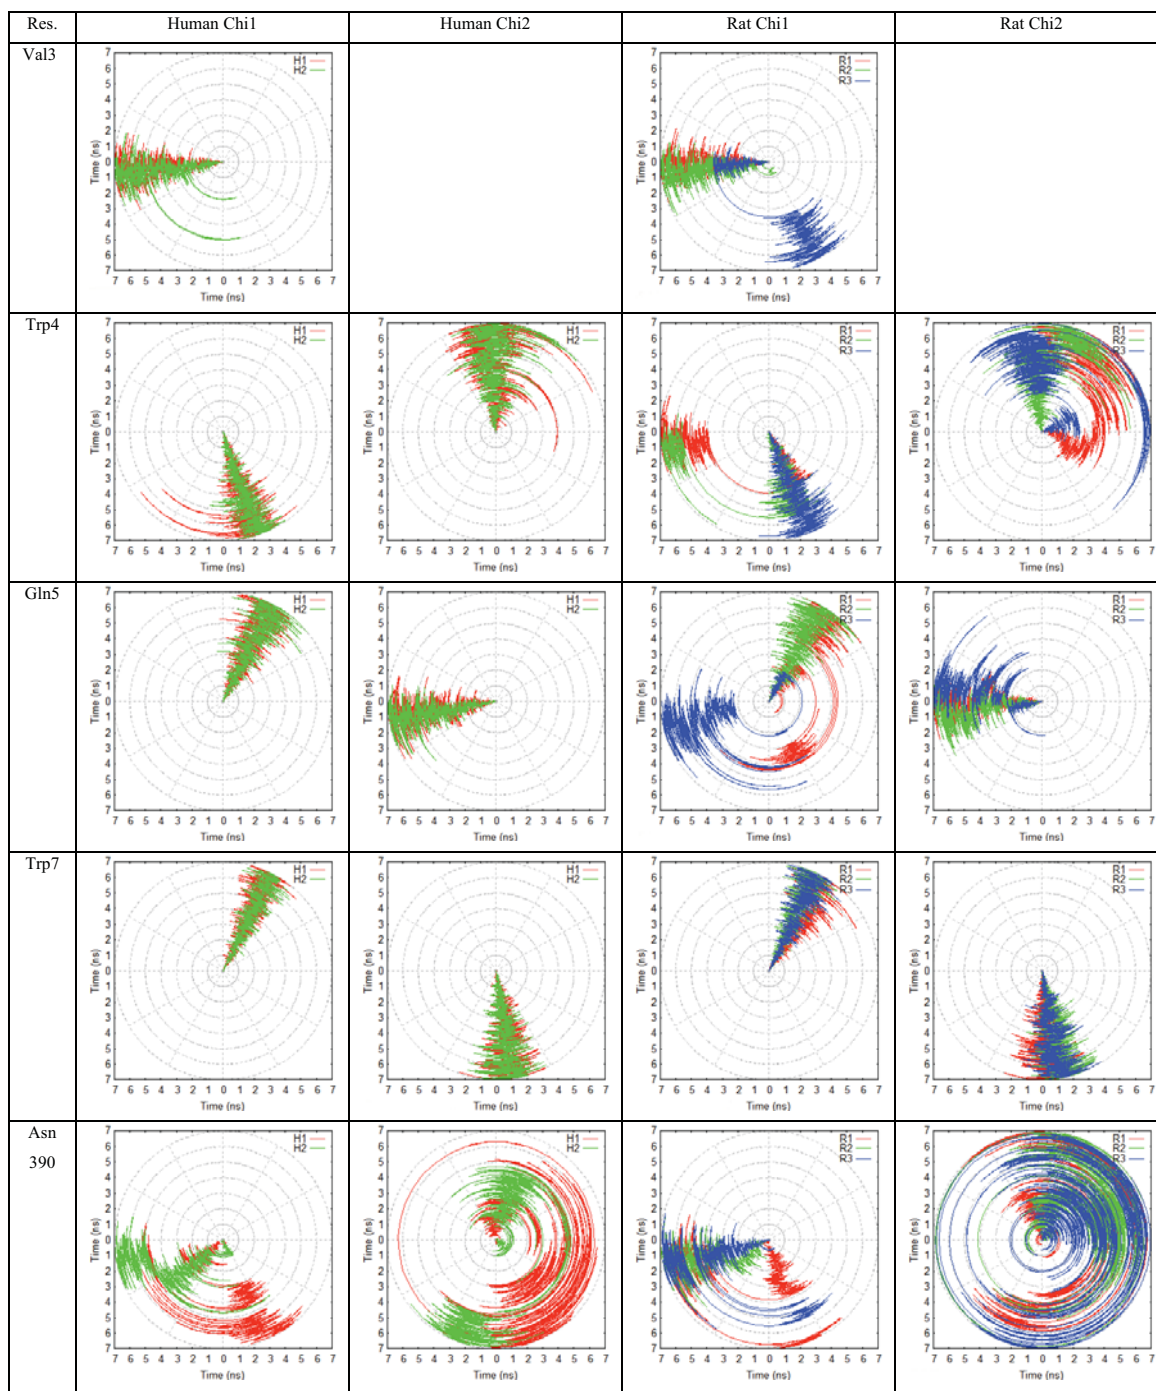

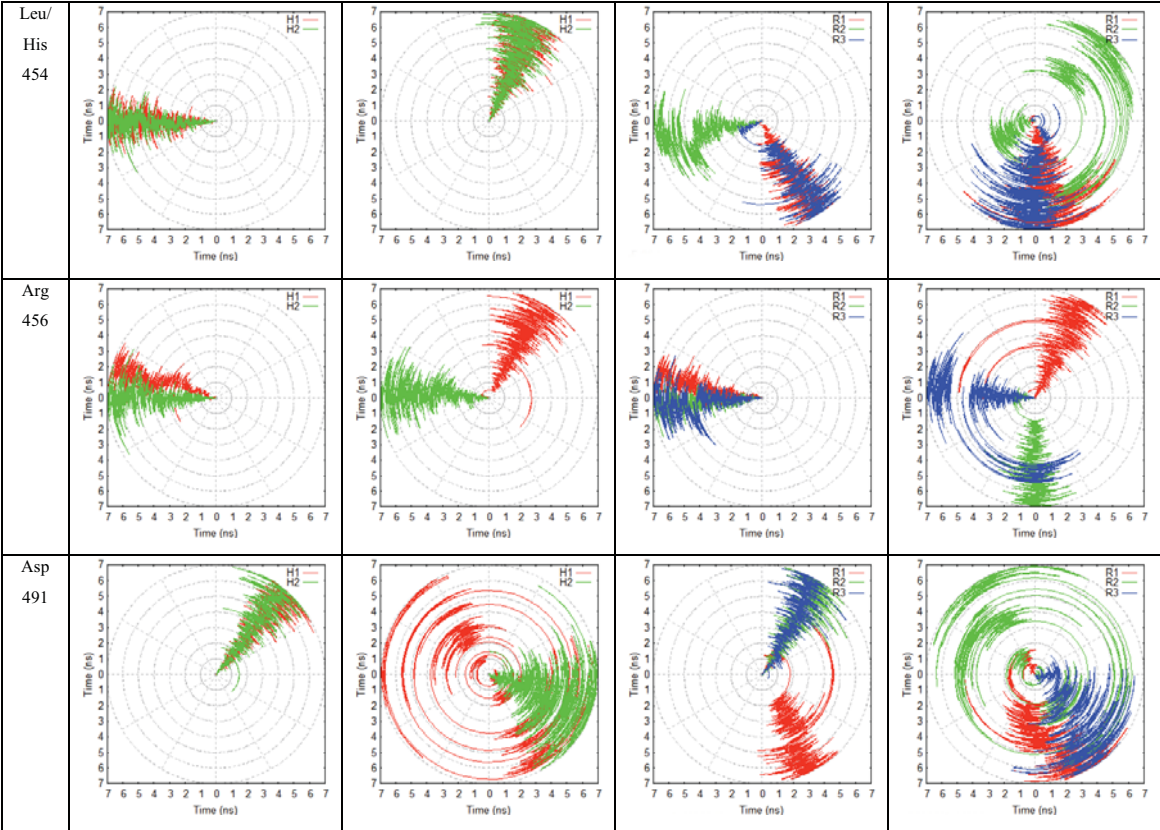

**Supplementary Figure SF3.** Non-polar interaction energies between compstatin and proximal protein sectors in the human and rat complexes, plotted as a function of the simulation time. The plots from **top** to **bottom** correspond to sectors 344-349, 388-393, 454-462 and 488-492; residues in these sectors were located within 7 Å from compstatin.

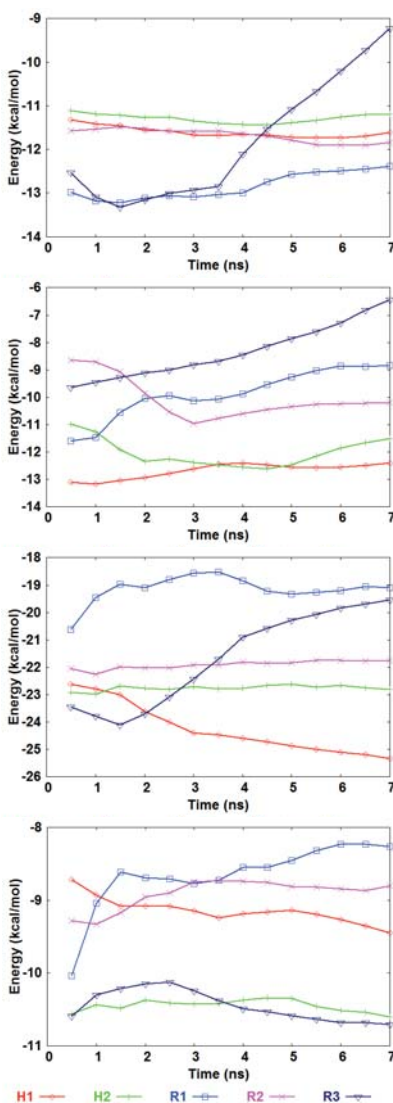

Supplementary Figure SF3 contains plots of the non-polar interaction energy of W4A9 with the four C3c proximal sectors 344-349, 388-393, 454-462 and 488-492. The ligand-C3c interactions with sectors 388-393 and 454-462 are significantly stronger in the human simulations. In run R1, the ligand loses contacts with the last three sectors and optimizes its interaction with the segment 344-349. In run R3, the ligand loses contacts with the first three sectors and improves its interactions with the last sector.

**Table ST1:** Human Complex: Compstatin residue interaction energies of Fig. 3 in main text. Indicative errors (in parentheses) correspond to the standard deviation of mean values, computed over four successive trajectory segments of equal length (1.75 ns). All values are in kcal/mol.

| Compstatin | Polar Energy<br>(kcal/mol) | Non-polar Energy<br>(kcal/mol) | Total Energy<br>(kcal/mol) |
|------------|----------------------------|--------------------------------|----------------------------|
| Ile1       | -3.13 (1.55)               | -7.12 (0.89)                   | -10.24 (2.22)              |
| Cys2       | -3.10 (1.03)               | -3.28 (0.31)                   | -6.38 (0.93)               |
| Val3       | -1.48 (0.08)               | -8.63 (0.18)                   | -10.12 (0.20)              |
| Trp4       | -7.31 (2.38)               | -9.63 (0.44)                   | -16.94 (2.50)              |
| Gln5       | -5.59 (0.87)               | -6.06 (0.31)                   | -11.65 (1.09)              |
| Asp6       | -1.50 (0.62)               | -1.83 (0.27)                   | -3.33 (0.80)               |
| Trp7       | -2.51 (0.34)               | -16.79 (0.81)                  | -19.31 (1.07)              |
| Gly8       | -3.94 (0.18)               | -1.96 (0.12)                   | -5.90 (0.13)               |
| Ala9       | -6.51 (1.37)               | -0.67 (0.18)                   | -7.18 (1.21)               |
| His10      | -12.44 (2.81)              | -3.05 (0.37)                   | -15.49 (2.56)              |
| Arg11      | -0.11 (0.42)               | -0.63 (0.11)                   | -0.74 (0.33)               |
| Cys12      | 0.24 (0.03)                | -0.83 (0.08)                   | -0.59 (0.08)               |
| Thr13      | 0.02 (0.02)                | -0.03 (0.01)                   | -0.01 (0.02)               |

**Table ST1 (continued):** Human Complex: C3c residue interaction energies of Fig. 3 in main text. Indicative errors (in parentheses) correspond to the standard deviation of mean values, computed over four successive trajectory segments of equal length (1.75 ns). All values are in kcal/mol.

| C3c    | Polar Energy<br>(kcal/mol) | Non-polar Energy<br>(kcal/mol) | Total Energy<br>(kcal/mol) |
|--------|----------------------------|--------------------------------|----------------------------|
| Pro344 | -0.08 (0.04)               | -0.29 (0.01)                   | -0.36 (0.05)               |
| Gly345 | -5.03 (0.32)               | -2.68 (0.06)                   | -7.72 (0.27)               |
| Met346 | -0.53 (0.12)               | -3.92 (0.11)                   | -4.45 (0.19)               |
| Pro347 | 0.00 (0.18)                | -4.22 (0.27)                   | -4.21 (0.38)               |
| Phe348 | 0.03 (0.04)                | -0.24 (0.05)                   | -0.21 (0.05)               |
| Asp349 | 0.08 (0.13)                | -0.13 (0.03)                   | -0.05 (0.12)               |
| Ser388 | -0.59 (0.72)               | -1.25 (0.29)                   | -1.84 (0.85)               |
| Ile389 | 0.27 (0.21)                | -0.95 (0.32)                   | -0.68 (0.26)               |
| Asn390 | -5.62 (1.64)               | -4.29 (0.57)                   | -9.92 (2.00)               |
| Thr391 | 0.01 (0.04)                | -1.15 (0.03)                   | -1.14 (0.05)               |
| His392 | -0.56 (0.14)               | -1.91 (0.44)                   | -2.47 (0.46)               |
| Pro393 | -0.01 (0.03)               | -2.48 (0.13)                   | -2.49 (0.14)               |
| Leu454 | -0.01 (0.03)               | -2.86 (0.25)                   | -2.87 (0.24)               |
| Leu455 | -0.44 (0.29)               | -2.90 (0.15)                   | -3.35 (0.23)               |
| Arg456 | -8.17 (0.65)               | -5.73 (0.46)                   | -13.90 (0.34)              |
| Met457 | -3.47 (0.55)               | -2.34 (0.10)                   | -5.82 (0.57)               |
| Asp458 | 1.34 (0.25)                | -2.03 (0.16)                   | -0.69 (0.24)               |
| Arg459 | -1.36 (0.73)               | -4.76 (0.86)                   | -6.12 (1.49)               |
| Ala460 | 0.11 (0.01)                | -0.17 (0.02)                   | -0.07 (0.02)               |
| His461 | -0.46 (0.06)               | -0.15 (0.02)                   | -0.61 (0.08)               |
| Glu462 | 1.04 (0.10)                | -3.30 (0.15)                   | -2.26 (0.09)               |
| Pro488 | -0.21 (0.01)               | -0.19 (0.01)                   | -0.39 (0.01)               |
| Gly489 | -0.60 (0.06)               | -1.84 (0.10)                   | -2.44 (0.15)               |
| Gln490 | 0.19 (0.05)                | -1.46 (0.02)                   | -1.27 (0.06)               |
| Asp491 | -23.33 (2.82)              | -4.42 (0.69)                   | -27.75 (2.28)              |
| Leu492 | -0.02 (0.05)               | -2.16 (0.33)                   | -2.18 (0.33)               |

**Table ST2:** Compstatin residue interaction energy differences (human – rat) of Fig. 3 in main text. Indicative errors (in parentheses) correspond to the standard deviation of mean values, computed over four successive trajectory segments of equal length (1.75 ns). All values are in kcal/mol.

| Compstatin | Polar Energy<br>(kcal/mol) | Non-polar Energy<br>(kcal/mol) | Total Energy<br>(kcal/mol) |
|------------|----------------------------|--------------------------------|----------------------------|
| Ile1       | -1.54 (2.06)               | -0.29 (1.64)                   | -1.83 (2.96)               |
| Cys2       | -2.15 (1.50)               | -0.86 (0.75)                   | -3.01 (1.76)               |
| Val3       | -0.38 (0.70)               | -1.23 (1.52)                   | -1.61 (2.06)               |
| Trp4       | 0.42 (4.50)                | -2.74 (3.04)                   | -2.32 (6.42)               |
| Gln5       | -1.96 (1.81)               | -0.59 (1.41)                   | -2.55 (2.80)               |
| Asp6       | -1.05 (1.49)               | -0.45 (0.54)                   | -1.49 (1.36)               |
| Trp7       | -0.84 (1.07)               | -1.66 (1.43)                   | -2.50 (1.98)               |
| Gly8       | -0.34 (0.94)               | -0.26 (0.37)                   | -0.60 (0.99)               |
| Ala9       | -0.24 (1.95)               | -0.06 (0.34)                   | -0.31 (1.69)               |
| His10      | -3.79 (5.14)               | 0.21 (0.82)                    | -3.59 (5.10)               |
| Arg11      | 0.50 (0.46)                | -0.10 (0.19)                   | 0.40 (0.44)                |
| Cys12      | 0.13 (0.08)                | -0.58 (0.18)                   | -0.45 (0.12)               |
| Thr13      | 0.00 (0.03)                | 0.00 (0.06)                    | 0.00 (0.06)                |



**Table ST2 (continued):** C3c residue interaction energy differences (human – rat) of Fig. 3 in main text. Indicative errors (in parentheses) correspond to the standard deviation of mean values, computed over four successive trajectory segments of equal length (1.75 ns). All values are in kcal/mol.

| C3c       | Polar Energy<br>(kcal/mol) | Non-polar Energy<br>(kcal/mol) | Total Energy<br>(kcal/mol) |
|-----------|----------------------------|--------------------------------|----------------------------|
| Pro344    | -0.02 (0.09)               | -0.07 (0.08)                   | -0.09 (0.13)               |
| Gly345Ala | -1.66 (1.62)               | 0.33 (0.92)                    | -1.33 (2.46)               |
| Met346    | -0.50 (0.19)               | -0.50 (0.85)                   | -1.00 (0.92)               |
| Pro347    | -0.08 (0.22)               | 0.04 (0.83)                    | -0.04 (0.92)               |
| Phe348    | 0.01 (0.06)                | 0.01 (0.09)                    | 0.02 (0.11)                |
| Asp349    | 0.03 (0.14)                | -0.05 (0.04)                   | -0.02 (0.13)               |
| Ser388    | -0.07 (1.18)               | -0.01 (0.41)                   | -0.08 (1.19)               |
| Ile389Val | 0.27 (0.26)                | 0.08 (0.44)                    | 0.35 (0.45)                |
| Asn390    | -3.80 (2.40)               | -1.07 (1.17)                   | -4.88 (3.31)               |
| Thr391    | -0.12 (0.28)               | -0.47 (0.32)                   | -0.58 (0.30)               |
| His392Pro | -0.49 (0.20)               | -1.49 (0.58)                   | -1.98 (0.66)               |
| Pro393Asn | 0.25 (0.25)                | -0.52 (0.96)                   | -0.27 (1.14)               |
| Leu454His | 1.35 (1.42)                | -0.88 (0.82)                   | 0.47 (1.78)                |
| Leu455    | -0.32 (0.47)               | -0.31 (0.35)                   | -0.64 (0.55)               |
| Arg456    | 0.40 (3.12)                | -0.77 (0.93)                   | -0.37 (3.57)               |
| Met457Thr | -0.40 (1.37)               | -0.29 (0.34)                   | -0.70 (1.55)               |
| Asp458    | -0.10 (0.51)               | 0.09 (0.55)                    | -0.02 (0.35)               |
| Arg459Ala | -1.21 (0.73)               | -1.87 (0.89)                   | -3.08 (1.51)               |
| Ala460Gly | 0.00 (0.03)                | 0.01 (0.03)                    | 0.01 (0.03)                |
| His461Gln | -0.02 (0.14)               | 0.04 (0.03)                    | 0.01 (0.17)                |
| Glu462    | 0.14 (0.42)                | 0.01 (0.38)                    | 0.15 (0.41)                |
| Pro488    | -0.02 (0.05)               | -0.01 (0.03)                   | -0.03 (0.07)               |
| Gly489    | -0.04 (0.16)               | -0.17 (0.28)                   | -0.21 (0.44)               |
| Gln490    | 0.02 (0.16)                | -0.08 (0.17)                   | -0.06 (0.18)               |
| Asp491    | -4.86 (7.60)               | 0.09 (0.88)                    | -4.77 (7.15)               |
| Leu492    | 0.04 (0.11)                | -0.61 (0.88)                   | -0.57 (0.94)               |
